# 1    **Sequence element enrichment analysis to determine the** 2    **genetic basis of bacterial phenotypes**

3

4    John A. Lees<sup>1†</sup>, Minna Vehkala<sup>2†</sup>, Niko Välimäki<sup>3</sup>, Simon R. Harris<sup>1</sup>, Claire  
5    Chewapreecha<sup>4</sup>, Nicholas J. Croucher<sup>5</sup>, Pekka Marttinen<sup>6,7</sup>, Antti Honkela<sup>8</sup>, Julian  
6    Parkhill<sup>1</sup>, Stephen D. Bentley<sup>1</sup>, Jukka Corander<sup>2\*</sup>

7    <sup>1</sup>Pathogen Genomics, Wellcome Trust Sanger Institute, Cambridge, UK

8    <sup>2</sup>Department of Mathematics and Statistics, University of Helsinki, Helsinki,  
9    Finland

10    <sup>3</sup>Department of Medical and Clinical Genetics, Genome-Scale Biology Research  
11    Program, University of Helsinki

12    <sup>4</sup>Department of Medicine, University of Cambridge, Cambridge, UK

13    <sup>5</sup>Department of Infectious Disease Epidemiology, Imperial College, London, UK

14    <sup>6</sup>Department of Computer Science, Aalto University, Espoo, Finland

15    <sup>7</sup>Helsinki Institute of Information Technology HIIT, Department of Computer  
16    Science, Aalto University, Espoo, Finland

17    <sup>8</sup>Helsinki Institute for Information Technology HIIT, Department of Computer  
18    Science, University of Helsinki, Helsinki, Finland

19

20    \* Corresponding author: [jukka.corander@helsinki.fi](mailto:jukka.corander@helsinki.fi)

21    † These authors contributed equally.

## 22    **Abstract**

23    Bacterial genomes vary extensively in terms of both gene content and gene  
 24    sequence – this plasticity hampers the use of traditional SNP-based methods for  
 25    identifying all genetic associations with phenotypic variation. Here we introduce  
 26    a computationally scalable and widely applicable statistical method (SEER) for  
 27    the identification of sequence elements that are significantly enriched in a  
 28    phenotype of interest. SEER is applicable to even tens of thousands of genomes  
 29    by counting variable-length k-mers using a distributed string-mining algorithm.  
 30    Robust options are provided for association analysis that also correct for the  
 31    clonal population structure of bacteria. Using large collections of genomes of the  
 32    major human pathogen *Streptococcus pneumoniae*, SEER identifies relevant  
 33    previously characterised resistance determinants for several antibiotics. We thus  
 34    demonstrate that our method can answer important biologically and medically  
 35    relevant questions.

36

## 37 Introduction

38 The rapidly expanding repositories of genomic data for bacteria hold an  
39 enormous and yet largely untapped potential for building a more detailed  
40 understanding of the evolutionary responses to changing environmental  
41 conditions, such as the widespread use of antibiotics and switches between host-  
42 niche as farming practices change.

43  
44 Genome-wide association studies (GWAS) for bacterial phenotypes have only  
45 recently started to appear<sup>1-5</sup>. Use of standard GWAS methods developed  
46 originally for human SNP data have been shown to be successfully applicable to  
47 core genome mutations in bacteria<sup>2,3</sup>. However, given the high level of genome  
48 plasticity of many of the known bacterial species, we can anticipate that such  
49 methods can only partially identify genetic determinants of phenotypic variation.  
50 To enable discovery of mechanisms related for instance to gene content,  
51 alternative alignment-free methods have also been introduced<sup>1,4</sup>. These methods  
52 use k-mers, i.e. DNA words of length k, as generalized alternatives to SNPs as  
53 putative explanations for observed differences in phenotype distributions. The  
54 main advantage of k-mers is their ability to capture several different types of  
55 variation present across a collection of genomes, including mutations,  
56 recombinations, variable promoter architecture, differences in gene content as  
57 well as capturing these variations in regions not present in all genomes.

58  
59 The previous study using k-mers to overcome limitations of SNP-based  
60 association used Monte-Carlo simulations of word gain and loss along an  
61 inferred phylogeny to control for population structure<sup>1</sup>, whereas SNP-based  
62 studies have used clustering algorithms on a core alignment and stratified  
63 association tests on the resulting groups of samples<sup>2,3</sup>. The former does not scale  
64 computationally to the hundreds of isolates required to find lower effect-size  
65 associations, and the latter requires a core alignment, which lacks sensitivity and  
66 difficult to produce when there is a large number of samples, or they are  
67 particularly diverse.

68

69 Here we present a sequence element enrichment analysis (SEER), a method  
70 computationally scalable to tens of thousands of genomes, implemented as a  
71 stand-alone pipeline that uses either *de novo* assembled contigs or raw read data  
72 as input. We apply SEER to both simulated and real data from a large and diverse  
73 population, and show that it can accurately detect associations with antibiotic  
74 resistance caused by both presence of a gene and by SNPs in coding regions.

## 76 Results

### 77 Implementation

78 SEER implements and combines three key insights which we discuss in turn: an  
79 efficient scan of all possible k-mers with a distributed string mining algorithm,  
80 an appropriate alignment-free correction for clonal population structure, and a  
81 fast and fully robust association analysis of all counted k-mers.

82  
83 K-mers allow simultaneous discovery of both short genetic variants and entire  
84 genes associated with a phenotype. Longer k-mers provide higher specificity but  
85 less sensitivity than shorter k-mers. Rather than arbitrarily selecting a length  
86 prior to analysis or having to count k-mers at multiple lengths and combine the  
87 results, we provide an efficient implementation that allows counting and testing  
88 simultaneously at all k-mers at lengths over 9 bases long.

89  
90 We offer three different methods to count k-mers in all samples in a study. For  
91 very large studies, or for counting directly from reads rather than assemblies, we  
92 provide an implementation of distributed string mining (DSM)<sup>6,7</sup> which limits  
93 maximum memory usage per core, but requires a large cluster to run. For data  
94 sets up to around 5 000 sample assemblies we have implemented a single core  
95 version fsm-lite (<https://github.com/nvalimak/fsm-lite>). For comparison with  
96 older datasets, or where resources do not allow the storage of the entire k-mer  
97 index in memory, DSK<sup>8</sup> is used to count a single k-mer length in each sample  
98 individually, the results of which are then combined.

99

100 To correct for the clonal population structure of bacterial populations, a distance  
101 matrix is constructed from a random subsample of these k-mers, on which multi-  
102 dimensional scaling is performed (Supplementary figure 1). Compared with  
103 modelling SNP variation<sup>9</sup>, use of k-mers as variable sequence elements has been  
104 previously shown to accurately estimate bacterial population structure. The  
105 projections of each sample in three dimensions are used as covariates to control  
106 for the clonal population structure. Simulations of bacterial genomes using a  
107 known tree showed this method gave a higher resolution control than using only  
108 population clustering (Supplementary figure 2). Before testing for association we  
109 filter k-mers based on their frequency and unadjusted p-value to reduce false  
110 positives from testing underpowered k-mers and reduce computational time.

111

112 Then, for each k-mer, a logistic curve is fitted to binary phenotype data, and a  
113 linear model to continuous data, using a time efficient optimisation routine to  
114 allow testing of all k-mers. Bacteria can be subject to extremely strong selection  
115 pressures, producing common variants with very large effect sizes, such as  
116 antibiotics inducing resistance-conferring variants. This can make the data  
117 perfectly separable, and consequently the maximum likelihood estimate ceases  
118 to exist for the logistic model. Firth regression<sup>10</sup> has been used to obtain results  
119 in these cases.

120

121 For the basal cut-off for significance we use  $p < 0.05$ , which in our testing we  
122 conservatively Bonferroni corrected to the threshold  $1 \times 10^{-8}$  based on every  
123 position in the *S. pneumoniae* genome having three possible mutations<sup>11</sup>, and all  
124 this variation being uncorrelated. This is a strict cut-off level that prevents a  
125 large number of false-positives due to the extensive amount of k-mers being  
126 tested, but does not over-penalise by correcting directly on the basis of the  
127 number of k-mers counted. Simulations suggested a cut-off of  $1.4 \times 10^{-8}$  would be  
128 appropriate, supporting this reasoning. Association effect size and p-value of the  
129 MDS components can also be included in the output, to compare lineage and  
130 variant effects on the phenotype variation.

131

132 K-mers reaching significance are filtered post-association and mapped onto both  
133 a well-annotated reference sequence and the annotated draft assemblies to allow  
134 discovery of variation in accessory genes not present in the reference strain. The  
135 significant k-mers themselves can also be assembled into a longer consensus  
136 sequence. Annotating variants by predicted function and effect (against a  
137 reference sequence) in the resulting k-mers facilitates fine-mapping of SNPs and  
138 small indels.

139

140 Meta-analysis of association studies increases sample size, which improves  
141 power and reduces false-positive rates<sup>12</sup>. To facilitate meta-analysis of k-mers  
142 across studies, the output of SEER includes effect size, direction and standard  
143 error, which can be used directly with existing software to meta-analyse all  
144 overlapping k-mers.

145

146 SEER is implemented in C++, and available at <https://github.com/johnlees/seer>  
147 as source code and a pre-compiled binary.

#### 148 **Application to simulated data**

149 To test the power of SEER across different sample sizes, we simulated 3 069  
150 *Streptococcus pneumoniae* genomes from the phylogeny observed in a Thai  
151 refugee camp<sup>13</sup> using parameters estimated from real data including  
152 accumulation of SNPs, indels (Supplementary figure 3), gene loss and  
153 recombination events. Using knowledge of the true alignments, we then  
154 artificially associated an accessory gene with a phenotype over a range of odds-  
155 ratios and evaluated power at different sample sizes (Fig. 1a). The expected  
156 pattern for this power calculation is seen, with higher odds-ratio effects being  
157 easier to detect. Currently detected associations in bacteria have had large effect  
158 sizes (OR > 28 host-specificity<sup>1</sup>, OR > 3 beta-lactam resistance<sup>2</sup>), and the required  
159 sample sizes predicted here are consistent with these discoveries.

160

161 The large k-mer diversity, along with the population stratification of gene loss,  
162 makes the simulated estimate of the sample size required to reach the stated  
163 power clearly conservative. Convergent evolution along multiple branches of a

164 phylogeny for a real population reacting to selection pressures will reduce the  
165 required sample size<sup>14</sup>.

166

167 We also used k-mers counted at constant lengths by DSK to perform the gene  
168 presence/absence association (Fig. 1b). Counting all informative k-mers rather  
169 than a range of pre-defined k-mer lengths gives greater power to detect  
170 associations, with 80% power being reached at around 1 500 samples, compared  
171 with 2 000 samples required by the pre-defined lengths. The slightly lower  
172 power at low sample numbers is due to a stricter Bonferroni adjustment being  
173 applied to the larger number of DSM k-mers over the DSK k-mers. This is exactly  
174 the expected advantage from including shorter k-mers to increase sensitivity, but  
175 as k-mers are correlated with each other due to evolving along the same  
176 phylogeny, using the same Bonferroni correction for multiple testing does not  
177 decrease specificity.

178

179 The strong linkage disequilibrium (LD) caused by the clonal reproduction of  
180 bacterial populations means that non-causal k-mers may also appear to be  
181 associated. This is well documented in human genetics; non-causal variants tag  
182 the causal variant increasing discovery power, but make it more difficult to fine-  
183 map the true link between genotype and phenotype<sup>15</sup>. In simulations it is difficult  
184 to replicate the LD patterns observed in real populations, as recombination maps  
185 for specific bacterial lineages are not yet known. To evaluate fine-mapping  
186 power of a SNP we instead used the real sequence data and simulated  
187 phenotypes based on changing the effect size of a known causal variant and  
188 evaluating the physical distance of significant k-mers from the variant site.

189

190 Using DSM we counted 68M k-mers which we then tested for association. The  
191 2 639 significant k-mers were placed into three categories if after mapping to a  
192 reference genome they contained the causal variant I100L (10), were within the  
193 same gene (74), or within 2.5kb in either direction (207). Figure 1c) shows the  
194 resulting power when random subsamples of the population are taken. As  
195 expected, power is higher when not specifying that the causal variant must be

196 hit, as there are many more k-mers which are in LD with the SNP than directly  
197 overlapping it, thus increasing sensitivity.

# 198 **Confirmation of known resistance mechanisms in a large population of *S.*** 199 ***pneumoniae***

200 SEER was applied to the sequenced genomes from the study described above,  
201 using measured resistance to five different antibiotics as the phenotype:  
202 chloramphenicol, erythromycin,  $\beta$ -lactams, tetracycline and trimethoprim.  
203 Chloramphenicol resistance is conferred by the *cat* gene on the integrative  
204 conjugative element (ICE) Tn5253 in the *S. pneumoniae* chromosome, and  
205 similarly tetracycline resistance is conferred by the *tetM* gene which is also  
206 carried on the ICE<sup>16</sup>. For both of these drug resistance phenotypes the ICE  
207 contains 99% of the significant k-mers, and the causal genes rank highly within  
208 the clusters (Table 1, Supplementary figure 4).

209  
210 Resistance to erythromycin is also conferred by presence of a gene, but there are  
211 multiple genes that can perform the same function (*ermB*, *mef*, *mel*)<sup>17</sup>. In the  
212 population studied, this phenotype was strongly associated with two large  
213 lineages (Supplementary figure 5), making the task of disentangling association  
214 with a lineage versus a specific locus more difficult. Significant k-mers are found  
215 in the mega and omega cassettes, which carry the *mel/mef* and *ermB* resistance  
216 elements respectively. Some k-mers do not map to the reference, as they are due  
217 to lineage specific associations with genetic elements not found in the reference  
218 strain. This highlights both the need to map to a close reference or draft  
219 assembly to interpret hits, as well as the use of functional follow-up to validate  
220 potential hits from SEER.

221  
222 Multiple mechanisms of resistance to  $\beta$ -lactams are possible<sup>2</sup>. Here, we consider  
223 just the most important (i.e. highest effect size) mutations, which are SNPs in the  
224 penicillin binding proteins *pbp2x*, *pbp2b* and *pbp1a*. In this case looking at  
225 highest coverage annotations finds these genes, but is not sufficient as so many  
226 k-mers are significant – either due to other mechanisms of resistance, physical  
227 linkage with causal variants or co-selection for resistance conferring mutations.  
228 Instead, looking at the k-mers with the most significant p-values gives the top



four hit loci as *pbp2b* ( $p=10^{-132}$ ), *pbp2x* ( $p=10^{-96}$ ), putative RNA pseudouridylate synthase UniParc B8ZPU5 ( $p=10^{-92}$ ) and *pbp1a* ( $p=10^{-89}$ ). The non-*pbp* hit is a homologue of a gene in linkage disequilibrium with *pbp2b*, which would suggest mismapping rather than causation of resistance.

Trimethoprim resistance in *S. pneumoniae* is conferred by the SNP I100L in the *folA/dyr* gene<sup>18</sup>. The *dpr* and *dpr* genes, which are adjacent in the genome, have the highest coverage of significant k-mers (Fig. 2). Following our fine-mapping procedure, we call four high-confidence SNPs that are predicted to be more likely to affect protein function than synonymous SNPs. One is the causal SNP, and the others appear to be hitchhikers in LD with I100L. By evaluating whether sites are conserved across the protein family<sup>19</sup>, the known causal SNP is ranked as the highest variant, showing that in this case fine-mapping is possible using the output from SEER.

We then compared the results from SEER with the results from two existing methods (as described in online methods). The first method uses mapping of SNPs against a reference, followed by applying the Cochran–Mantel–Haenszel test at every variable site<sup>2</sup>. The second uses dsk<sup>8</sup> to count k-mers of length 31, and a highly robust correction for population structure which scales to around 100 genomes<sup>1</sup>.

The results are shown in supplementary table 1. Both SEER and association of a core mapping of SNPs identify resistances caused by presence of a gene, when it is present in the reference used for mapping. Both produce their most significant p-values in the causal element, though SEER appears to have a lower false-positive rate. However, as demonstrated by chloramphenicol resistance, if not enough SNP calls are made in the causal gene this hinders fine-mapping. SNP-mediated resistance showed the same pattern since many other SNPs were ranked above the causal variant. In the case of  $\beta$ -lactam resistance both methods seem to perform equally well, likely due to the higher rate of recombination and the creation of mosaic *pbp* genes.

262 Additionally, as for erythromycin resistance, when an element is not present in  
263 the reference SNPs have been called against it is not detectable in SNP-based  
264 association analysis. In such cases multiple mappings against other reference  
265 genomes would have to be made, which is a tedious and computationally costly  
266 procedure. Alternatively a draft assembly with the phenotype from the study  
267 could be picked as a second reference to map to, however this may be lower  
268 quality than those in public databases picked by genetic content rather than  
269 phenotype, and would not necessarily be able to detect multiple genetic  
270 mechanisms (as in the case of erythromycin resistance, no single sequenced  
271 genome contains all known resistance mechanisms).

272  
273 Since the k-mer results from SEER are reference-free, these issues are avoided as  
274 just the significant k-mers can quickly be mapped to all available references.  
275 Alternatively, the significant k-mers can be mapped to all draft assemblies in the  
276 study, at least one of which is guaranteed to contain the k-mer, to check if any  
277 annotations are overlapped.

278  
279 For the small sample, 31mer approach significance was not reached for  
280 chloramphenicol, tetracycline or trimethoprim as the effect size of any k-mer is  
281 too small to be detected in the number of samples accessible by the method.  
282 Erythromycin had 19 307 hits, and  $\beta$ -lactams 419 hits, at between 1-2% MAF  
283 which are all false positives that would likely have been excluded by a fully  
284 robust population structure correction method.

## 285 Discussion

286 SEER is a reference-independent, scalable pipeline capable of finding bacterial  
287 sequence elements associated with a range of phenotypes while controlling for  
288 clonal population structure. The sequence elements can be interpreted in terms  
289 of protein function using sequence databases, and we have shown that even  
290 single causal variants can be fine-mapped using the SEER output.

291  
292 Our use of all informative k-mers together with robust regression methods, and  
293 the ability to analyse very large sample sizes show improved sensitivity over

existing methods. This provides a generic approach capable of analysing the rapidly increasing number of bacterial whole genome sequences linked with a range of different phenotypes. The output can readily be used in a meta-analysis of sequence elements to facilitate the combination of new studies with published data, increasing both discovery power and confirming the significance of results. As with all association methods, our approach is limited by the amount of recombination and convergent evolution that occurs in the observed population, since the discovery of causal sequence elements is principally constrained by the extent of linkage disequilibrium. However, by introducing improved computational scalability and statistical sensitivity SEER significantly pushes the existing boundaries for answering important biologically and medically relevant questions.

## Online methods

### Counting informative k-mers in samples

Over all  $N$  samples, all k-mers over 9 bases long that occur in more than one sample are counted. All non-informative k-mers are omitted from the output; a k-mer  $X$  is not informative if any one base extension to the left ( $aX$ ) or right ( $Xa$ ) has exactly the same frequency support vector as  $X$ . The frequency support vector has  $N$  entries, each being the number of occurrences of k-mer  $X$  in that sample. Further filtering conditions are explained in the sections below.

Distributed string mining (DSM)<sup>6,7</sup> parallelises to as much as one sample per core, and either 16 or 64 master server processes. DSM includes an optional entropy-filtering setting that filters the output k-mers based on both number of samples present and frequency distribution. On our 3 069 simulated genomes this took 2 hrs 38 min on 16 cores, and used 1Gb RAM. The distributed approach is applicable up to terabytes of short-read data<sup>7</sup>, but requires a cluster environment to run. As an easy-to-use alternative, we propose a single core version of DSM that is applicable for gigabyte-scale data. We implemented the single core version based on a succinct data structure library<sup>25</sup> to produce the same output as DSM. On 675 *S. pyogenes* genomes this took 3hrs 44min and used 22.3Gb RAM.

326

327 To count single k-mer lengths, an associative array was used to combine the  
328 results from DSK in memory. We concatenated results from k-mer lengths of 21,  
329 31 and 41, as in previous studies<sup>1</sup>. This can scale to large genome numbers by  
330 instead using external sorting to avoid storing the entire array in memory.

### 331 **Filtering k-mers**

332 K-mers are filtered if either they appear in <1% or >99% of samples, or are over  
333 100 bases long. We also test if the p-value of association in a simple  $\chi^2$  test (1  
334 d.f.) is less than  $10^{-5}$ , as in simulations this was true for all true positives. In the  
335 case of a continuous phenotype a Welch two-sample t-test is used instead.

### 336 **Covariates to control for population structure**

337 A random sample of between 0.1% and 1% of k-mers appearing in between 5-  
338 95% of isolates is taken. We then construct a pairwise distance matrix **D**, with  
339 each element being equal to a sum over all  $m$  sampled k-mers:

$$d_{ij} = \sum_m \|k_{im} - k_{jm}\|$$

340 where  $k_{im}$  is 1 if the  $m$ th sampled k-mer is present in sample  $i$ , and 0 otherwise.

341

342 Metric multi-dimensional scaling is then performed, projecting these distances  
343 into three dimensions. The normalised eigenvectors of each dimension are used  
344 as covariates in the regression model. The number of dimensions used is a user-  
345 adjustable parameter, and can be evaluated by the goodness-of-fit and the  
346 magnitude of the eigenvalues. In species tree with two lineages and 96 isolates  
347 one dimension was sufficient as a population control, whereas for the larger  
348 collection of 3069 isolates 10-15 dimensions were needed to give tight control  
349 (Supplementary figure 6). Over all our studies, generally three dimensions  
350 appeared a good trade-off between sensitivity and specificity.

### 351 **Logistic and linear regression**

352 For samples with binary outcome vector **y**, for each k-mer a logistic model is  
353 fitted:

$$\log\left(\frac{y}{I-y}\right) = \mathbf{x}\boldsymbol{\beta}$$

where absence and presence for each k-mer coded as 0 and 1 respectively in column 2 of the design matrix  $\mathbf{X}$  (column 1 is a vector of ones, giving an intercept term). Subsequent columns  $j$  of  $\mathbf{X}$  contain the eigenvectors of the MDS projection, user-supplied categorical covariates (dummy encoded), and quantitative covariates (normalised). The BFGS algorithm is used to maximise the log likelihood  $L$  in terms of the gradient vector  $\boldsymbol{\beta}$  (using an analytic expression for  $d(\log L)/d\boldsymbol{\beta}$ ):

$$\log L \propto \sum_i y_i \cdot \log(\text{sig}(\mathbf{X}\boldsymbol{\beta})_i) + (1 - y_i) \cdot \log(\text{sig}(1 - \mathbf{X}\boldsymbol{\beta})_i)$$

where sig is the sigmoid function. If this fails to converge,  $n$  Newton-Raphson iterations are applied to  $\boldsymbol{\beta}$ :

$$\boldsymbol{\beta}_{n+1} = \boldsymbol{\beta}_n + [-L''(\boldsymbol{\beta}_n)]^{-1} \cdot L'(\boldsymbol{\beta}_n)$$

from a starting point using the mean phenotype as the intercept, and the root-mean squared beta from a test of k-mers passing filtering

$$\beta_{0,0} = \frac{\sum y_i}{n}$$

$$\beta_{0,j>0} = 0.1$$

which is slower, but has a higher success rate. If this fails to converge due to the observed points being separable in the high dimensional space, or the standard error of the slope is greater than 3 (which empirically indicated almost separable data, with no counts in one element of the contingency table), Firth logistic regression<sup>10</sup> is then applied. This adds an adjustment to  $\log L$ :

$$\log L(\boldsymbol{\beta})^* = \log L(\boldsymbol{\beta}) + \frac{1}{2} \cdot \log \left| \frac{d^2 L}{d\boldsymbol{\beta}^2}(\boldsymbol{\beta}) \right|$$

using which Newton-Raphson iterations are applied as above.

371

In the case of a continuous phenotype a linear model is fitted:

$$\mathbf{Y} = \mathbf{X}\boldsymbol{\beta}$$

The squared distance  $U(\boldsymbol{\beta})$

$$U(\boldsymbol{\beta}) = \|\mathbf{y} - \mathbf{X}\boldsymbol{\beta}\|^2$$

is minimised using the BFGS algorithm. If this fails to converge then the analytic solution is obtained by orthogonal decomposition:

$$\mathbf{X} = \mathbf{Q}\mathbf{R}$$

then back-solving for  $\boldsymbol{\beta}$  in:

376

$$R\beta = Q^T y$$

377

378 In both cases the standard error on  $\beta_1$  is calculated by inverting the Fisher  
379 information matrix  $d^2L/d\beta^2$  (inversions are performed by Cholesky  
380 decomposition, or if this fails due to the matrix being almost singular the Moore-  
381 Penrose pseudoinverse is taken) to obtain the variance-covariance matrix. The  
382 Wald statistic is calculated with the null hypothesis of no association ( $\beta_1 = 0$ ):

$$W = \frac{\beta_1}{SE(\beta_1)}$$

383 which is the test statistic of a  $\chi^2$  distribution with 1 d.f. This is equivalent to the  
384 positive tail of a standard normal distribution, the integral of which gives the p-  
385 value. To calculate an empirical significance testing cut-off for the p-value under  
386 multiple correlated tests, we observed the distribution of p-values from 100  
387 random permutations of phenotype. Setting the family-wise error rate (FWER) at  
388 0.05 gave a cut-off of  $1.4 \times 10^{-8}$ .

### 389 SEER implementation

390 SEER is implemented in C++ using the armadillo linear algebra library<sup>26</sup>, and dlib  
391 optimisation library<sup>27</sup>. On a simulation of 3 069 diverse 0.4Mb genomes, 143M k-  
392 mers were counted by DSM and 25M 31-mers by DSK. On the largest DSM set,  
393 using 16 cores and subsampling 300 000 k-mers (0.2% of the total), calculating  
394 population covariates took 6hr 42min and 8.33GB RAM. This step is  $O(N^2M)$   
395 where N is number of samples and M is number of k-mers, but can be  
396 parallelised across up to  $N^2$  cores.

397

398 Processing all 143M informative k-mers as described took 69min 44s and 23MB  
399 RAM on 16 cores. This step is  $O(M)$  and can be parallelised across up to M cores.

400

401 On the real dataset of full length genomes the 68M informative k-mers counted  
402 was less than the simulated dataset above, as the parameters of the simulation  
403 created particularly diverse final genomes.

## 404 **Interpreting significant k-mers**

405 K-mers reaching the threshold for significance are then post-association filtered  
406 requiring  $\beta_1 > 0$  as a negative effect size does not make biological sense.  
407 Remaining k-mers are searched for by exact match in their *de novo* assemblies,  
408 and annotations of features examined for overlap of function. BLAT<sup>28</sup> is also used  
409 with a step size of 2 and minimum match size of 15 to find inexact but close  
410 matches to a well annotated reference sequence.

411  
412 To better search for gene clusters associated with phenotype, these k-mers are  
413 assembled using Velvet<sup>29</sup> choosing a smaller sub-k-mer size which maximises  
414 longest contig length of the final assembly. K-mers which are then substrings of  
415 others significant k-mers are removed.

## 416 **Mapping of a single SNP**

417 Using the BLAT mapping of significant k-mers to a reference sequence, SNPs are  
418 called using bcftools<sup>30</sup>. Quality scores for a read are set to be identical, and are  
419 set as the Phred-scaled Holm-adjusted p-values from association. High quality  
420 (QUAL > 100) SNPs are then annotated for function using SnpEff<sup>31</sup>, and the effect  
421 of missense SNPs on protein function is ranked using SIFT<sup>19</sup>.

## 422 **Comparison to existing methods**

423 We compare to two existing methods. The first uses a core-genome SNP mapping  
424 along with population clusters defined from the same alignment to perform a  
425 Cochran-Mantel-Haenszel test at every called variant site<sup>2</sup>. The second uses a  
426 fixed k-mer length of 31 as counted by dsk<sup>8</sup>, with a Monte Carlo phylogeny-based  
427 population control<sup>1</sup>. As the second method is not scalable to this population size  
428 we used our population control as calculated from all genomes in the population,  
429 and a subsample of 100 samples to calculate association statistics, which is  
430 roughly the number computationally accessible by this method. In both cases,  
431 the same Bonferroni correction is used as for SEER.

## 432 **Simulating bacterial populations**

433 A random subset of 450 genes from the *Streptococcus pneumoniae* ATCC  
434 700669<sup>16</sup> strain were used as the starting genome for ALF<sup>32</sup>. ALF simulated 3069

435 final genomes along the phylogeny observed in a Thai refugee camp<sup>13</sup>. An  
 436 alignment between *S. pneumoniae* strains R6, 19F and *Streptococcus mitis* B6  
 437 using Progressive Cactus was used to estimate rates in the GTR matrix and the  
 438 size distribution of insertions and deletions (INDELs – Supplementary figure 3).  
 439 Previous estimates for the relative rate of SNPs to INDELs<sup>33</sup> and the rate of  
 440 horizontal gene transfer and loss<sup>13</sup> were used.  
 441 pIRS<sup>34</sup> was used to simulate error-prone reads from genomes at the tips of the  
 442 tree, which were then assembled by Velvet<sup>29</sup>. DSM was used to count k-mers  
 443 from these *de novo* assemblies.

444  
 445 To test the similarity of the population control to existing methods, 96 full  
 446 *Streptococcus pneumoniae* ATCC 700669 genomes were evolved with ALF.  
 447 Intergenic regions were also evolved using Dawg<sup>35</sup> at a previously determined  
 448 rate<sup>36</sup>. These were combined, and assemblies generated and k-mers counted as  
 449 above. A distance matrix was created from 1% of the k-mers as described above,  
 450 and a neighbour-joining tree produced from this.

451  
 452 The resulting tree was ranked against the true tree by counting one for each pair  
 453 of isolates in each BAPS<sup>37</sup> cluster which had an isolate not in the same BAPS  
 454 cluster as a descendent of their MRCA.

#### 455 **Simulating phenotype based on genotype and odds-ratio**

456 Ratio of cases to controls in the population ( $S_R$ ) was set at 50% to represent  
 457 antibiotic resistance, and a single variant (gene presence/absence or a SNP) was  
 458 designated as causal. Minor allele frequency (MAF) in the population is set from  
 459 the simulation, and odds-ratio (OR) can be varied. The number of disease cases  
 460  $D_E$  is then the solution to a quadratic equation<sup>38</sup>, which is related to probability of  
 461 a sample being a case by:

$$p_{\text{case}|\text{exposed}} = \frac{D_E}{\text{MAF}}$$

$$p_{\text{case}|\text{not exposed}} = \frac{\frac{S_R}{S_R + 1} - D_E}{1 - \text{MAF}}$$

462 The population was then randomly subsampled 100 times, with case and control  
 463 status assigned for each run using these formulae. Power was defined by the



464 proportion of runs that had at least one k-mer in the gene associated with  
465 phenotype reaching significance.

## 466 References

467

- 468 1. Sheppard, S. K. *et al.* Genome-wide association study identifies vitamin B5  
469 biosynthesis as a host specificity factor in *Campylobacter*. *Proc. Natl. Acad.*  
470 *Sci.* **110**, 11923–11927 (2013).  
471
- 472 2. Chewapreecha, C. *et al.* Comprehensive Identification of Single Nucleotide  
473 Polymorphisms Associated with Beta-lactam Resistance within  
474 Pneumococcal Mosaic Genes. *PLoS Genet.* **10**, e1004547 (2014).  
475
- 476 3. Laabei, M. *et al.* Predicting the virulence of MRSA from its genome  
477 sequence. *Genome Res.* **24**, 839–849 (2014).  
478
- 479 4. Weinert, L. a. *et al.* Genomic signatures of human and animal disease in the  
480 zoonotic pathogen *Streptococcus suis*. *Nat. Commun.* **6**, 6740 (2015).  
481
- 482 5. Chen, P. E. & Shapiro, B. J. The advent of genome-wide association studies  
483 for bacteria. (2015).  
484
- 485 6. Välimäki, N. & Puglisi, S. in *Algorithms Bioinforma. SE - 35* (Raphael, B. &  
486 Tang, J.) **7534**, 441–452 (Springer Berlin Heidelberg, 2012).  
487
- 488 7. Seth, S., Välimäki, N., Kaski, S. & Honkela, A. Exploration and retrieval of  
489 whole-metagenome sequencing samples. *Bioinformatics* **30**, 16 (2014).  
490
- 491 8. Rizk, G., Lavenier, D. & Chikhi, R. DSK: K-mer counting with very low  
492 memory usage. *Bioinformatics* **29**, 652–653 (2013).  
493
- 494 9. Tasoulis, S. *et al.* Random projection based clustering for population  
495 genomics. in *2014 IEEE Int. Conf. Big Data (Big Data)* 675–682 (2014).  
496 doi:10.1109/BigData.2014.7004291  
497
- 498 10. Heinze, G. & Schemper, M. A solution to the problem of separation in  
499 logistic regression. *Stat. Med.* **21**, 2409–2419 (2002).  
500
- 501 11. Ford, C. B. *et al.* Mycobacterium tuberculosis mutation rate estimates from  
502 different lineages predict substantial differences in the emergence of drug-

- 503 resistant tuberculosis. *Nat. Genet.* **45**, 784–790 (2013).  
504
- 505 12. Evangelou, E. & Ioannidis, J. P. A. Meta-analysis methods for genome-wide  
506 association studies and beyond. *Nat. Rev. Genet.* **14**, 379–389 (2013).  
507
- 508 13. Chewapreecha, C. *et al.* Dense genomic sampling identifies highways of  
509 pneumococcal recombination. *Nat. Genet.* **46**, 305–9 (2014).  
510
- 511 14. Farhat, M. R. *et al.* Genomic analysis identifies targets of convergent  
512 positive selection in drug-resistant *Mycobacterium tuberculosis*. *Nat.*  
513 *Genet.* **45**, 1183–9 (2013).  
514
- 515 15. Spain, S. L. & Barrett, J. C. Strategies for fine-mapping complex traits. *Hum.*  
516 *Mol. Genet.* **24**, R111–R119 (2015).  
517
- 518 16. Croucher, N. J. *et al.* Role of conjugative elements in the evolution of the  
519 multidrug-resistant pandemic clone *Streptococcus pneumoniae* Spain23F  
520 ST81. *J. Bacteriol.* **191**, 1480–1489 (2009).  
521
- 522 17. Croucher, N. J. *et al.* Rapid pneumococcal evolution in response to clinical  
523 interventions. *Science* **331**, 430–4 (2011).  
524
- 525 18. Maskell, J. P., Sefton, a. M. & Hall, L. M. C. Multiple mutations modulate the  
526 function of dihydrofolate reductase in trimethoprim-resistant  
527 *Streptococcus pneumoniae*. *Antimicrob. Agents Chemother.* **45**, 1104–1108  
528 (2001).  
529
- 530 19. Ng, P. C. & Henikoff, S. SIFT: predicting amino acid changes that affect  
531 protein function. *Nucleic Acids Res.* **31**, 3812–3814 (2003).  
532
- 533 20. Roberts, A. P. & Mullany, P. A modular master on the move: the Tn916  
534 family of mobile genetic elements. *Trends Microbiol.* **17**, 251–258 (2009).  
535
- 536 21. Dubnau, D. DNA Uptake in Bacteria. *Annu. Rev. Microbiol.* **53**, 217–244  
537 (1999).  
538
- 539 22. Lefébure, T. & Stanhope, M. J. Evolution of the core and pan-genome of  
540 *Streptococcus*: positive selection, recombination, and genome  
541 composition. *Genome Biol.* **8**, R71 (2007).  
542
- 543 23. Raeder, R. & Boyle, M. D. Association between expression of

- 544 immunoglobulin G-binding proteins by group A streptococci and virulence  
545 in a mouse skin infection model. *Infect. Immun.* **61**, 1378–1384 (1993).  
546
- 547 24. Raeder, R. & Boyle, M. D. Analysis of immunoglobulin G-binding-protein  
548 expression by invasive isolates of *Streptococcus pyogenes*. *Clin. Diagn. Lab.*  
549 *Immunol.* **2**, 484–486 (1995).  
550
- 551 25. Gog, S., Beller, T., Moffat, A. & Petri, M. in *Exp. Algorithms SE - 28*  
552 (Gudmundsson, J. & Katajainen, J.) **8504**, 326–337 (Springer International  
553 Publishing, 2014).  
554
- 555 26. Sanderson, C. Armadillo: An Open Source C++ Linear Algebra Library for  
556 Fast Prototyping and Computationally Intensive Experiments. in *NICTA*  
557 **NICTA**, 1–16 (2010).  
558
- 559 27. King, D. E. Dlib-ml: A Machine Learning Toolkit. *J. Mach. Learn. Res.* **10**,  
560 1755–1758 (2009).  
561
- 562 28. Kent, W. J. BLAT—The BLAST-Like Alignment Tool. *Genome Res.* **12**, 656–  
563 664 (2002).  
564
- 565 29. Zerbino, D. R. & Birney, E. Velvet: algorithms for de novo short read  
566 assembly using de Bruijn graphs. *Genome Res.* **18**, 821–9 (2008).  
567
- 568 30. Li, H. A statistical framework for SNP calling, mutation discovery,  
569 association mapping and population genetical parameter estimation from  
570 sequencing data. *Bioinformatics* **27**, 2987–2993 (2011).  
571
- 572 31. Cingolani, P. *et al.* A program for annotating and predicting the effects of  
573 single nucleotide polymorphisms, SnpEff: SNPs in the genome of  
574 *Drosophila melanogaster* strain w1118; iso-2; iso-3. *Fly (Austin)*. **6**, 1–13  
575 (2012).  
576
- 577 32. Dalquen, D. a, Anisimova, M., Gonnet, G. H. & Dessimoz, C. ALF--a  
578 simulation framework for genome evolution. *Mol. Biol. Evol.* **29**, 1115–23  
579 (2012).  
580
- 581 33. Chen, J. Q. *et al.* Variation in the ratio of nucleotide substitution and indel  
582 rates across genomes in mammals and bacteria. *Mol. Biol. Evol.* **26**, 1523–  
583 1531 (2009).  
584

- 585 34. Hu, X. *et al.* pIRS: Profile-based Illumina pair-end reads simulator.  
586 *Bioinformatics* **28**, 1533–1535 (2012).  
587
- 588 35. Cartwright, R. a. DNA assembly with gaps (Dawg): Simulating sequence  
589 evolution. *Bioinformatics* **21**, 31–38 (2005).  
590
- 591 36. Kosiol, C., Holmes, I. & Goldman, N. An empirical codon model for protein  
592 sequence evolution. *Mol. Biol. Evol.* **24**, 1464–1479 (2007).  
593
- 594 37. Cheng, L., Connor, T. R., Sirén, J., Aanensen, D. M. & Corander, J.  
595 Hierarchical and spatially explicit clustering of DNA sequences with BAPS  
596 software. *Mol. Biol. Evol.* **30**, 1224–8 (2013).  
597
- 598 38. Newman, S. C. in *Biostat. Methods Epidemiol.* 329–330 (John Wiley & Sons,  
599 Inc., 2003). doi:10.1002/0471272612.app4  
600

## 601 Acknowledgements

602 We would like to thank James Hadfield for his help in integrating SEER's output  
603 into the bacterial genome visualisation tool JSCandy, and Jeff Barrett and his  
604 group for helpful discussions on the relation of association studies in human  
605 genetics to prokaryotic genetics.  
606 This work was supported by Wellcome Trust grant 098051, MRC grant 1365620,  
607 ERC grant 239784, Academy of Finland grant 287665 and COIN Centre of  
608 Excellence.

## 609 Competing Interests

610 The authors declare no competing interests.

## 611 Author Contributions

612 JAL – Designed method, performed analysis, wrote manuscript.  
613 MV – Designed method, performed analysis, wrote manuscript.  
614 NV – Participated in method design, edited manuscript.  
615 SRH – Helped with interpretation data  
616 CC – Prepared genetic and metadata from Maela isolates.  
617 NJC – Helped with interpretation of antibiotic resistance elements, edited  
618 manuscript.

PM – Participated in method design, edited manuscript.  
 AH – Participated in method design, edited manuscript.  
 JP – Advised on microbiological interpretation, edited manuscript.  
 SDB – Advised on microbiological interpretation, edited manuscript.  
 JC - Designed method, performed analysis, wrote manuscript.

## Data Access

SEER is available at <https://github.com/johnlees/seer>, DSM at <https://github.com/HIITMetagenomics/dsm-framework> and fsm-lite at <https://github.com/nvalimak/fsm-lite>.  
 Scripts used to perform the simulations are available at <https://github.com/johnlees/bioinformatics>

## Figure Captions

Fig. 1: Using simulations and subsamples of the population as described in the online methods, power for a) detecting gene presence/absence at different odds-ratios b) using all informative k-mers versus a single length c) detecting k-mers near, in the correct gene, or containing the causal variant for trimethoprim resistance. All curves are logistic fits to the mean power over 100 subsamples.

Fig. 2: Fine mapping trimethoprim resistance. The locus pictured contains 72 significant k-mers, the most of any gene cluster. Coverage over the locus is pictured at the bottom of the figure. Shown above the genes are high quality missense SNPs, plotted using their p-value for affecting protein function as predicted by SIFT.

## Figures

Fig. 1

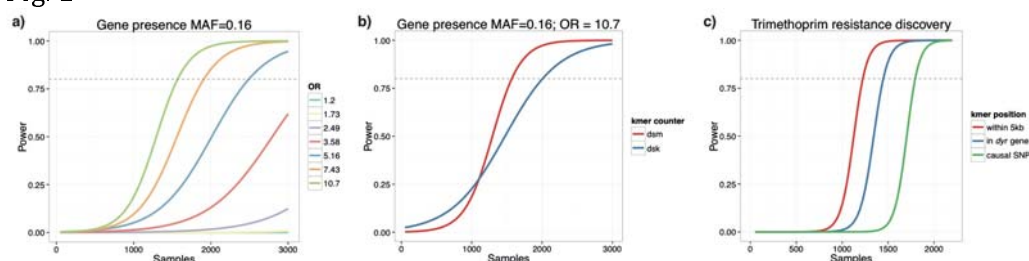

Fig. 2

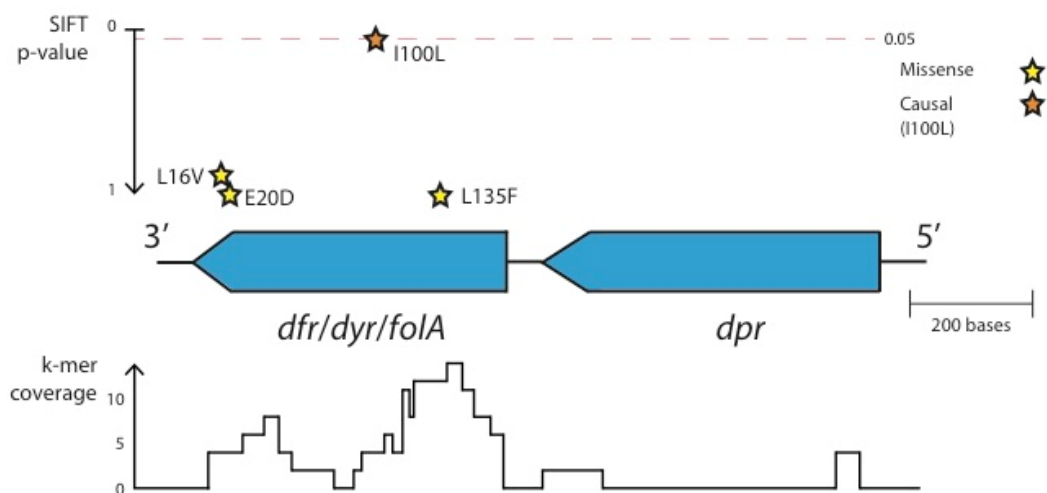

## Tables

| Antibiotic       | Resistant samples | Number of significant k-mers |                     |                                                                                               |                                                            |
|------------------|-------------------|------------------------------|---------------------|-----------------------------------------------------------------------------------------------|------------------------------------------------------------|
|                  |                   | Total                        | Mapped to reference | Highest coverage annotation                                                                   | Causal element                                             |
| Chloramphenicol  | 204 (7%)          | 1 526                        | 1 526               | 1 508 – ICE<br>288 – ORF (UniParc B8ZK82)<br>206 – <i>rep</i><br>166 – <i>cat</i>             | 166 – <i>cat</i>                                           |
| Erythromycin     | 803 (26%)         | 1 154                        | 112                 | 10 – permease (UniParc B8ZKV5)<br>8 – <i>prfC</i><br>6 – <i>gatA</i><br>4 – ICE               | 4 – mega element<br>2 – <i>mef</i><br>2 – omega element    |
| $\beta$ -lactams | 1 563 (51%)       | 23 876                       | 17 453              | 381 – ICE<br>145 – prophage MM1<br>50 – SPN23F15110 (UniParc B8ZLE7)<br>49 – ICE <i>orf16</i> | 47 – <i>pbp2x</i><br>20 – <i>pbp2b</i><br>8 – <i>pbp1a</i> |
| Tetracycline     | 1 958 (64%)       | 962                          | 962                 | 962 – ICE<br>136 – ICE <i>orf16</i><br>121 – ICE <i>orf15</i><br>96 – <i>tetM</i>             | 96 – <i>tetM</i>                                           |
| Trimethoprim     | 2 553 (83%)       | 2 639                        | 210                 | 96 – <i>tetM</i><br>21 – <i>dyr</i>                                                           | 21 – <i>dyr</i>                                            |

Table 1: Results from SEER for antibiotic resistance binary outcome on a population of 3069 *S. pneumoniae*. Significant k-mers are first interpreted by mapping to the ATCC 700669 reference genome. Up to the first four highest covered annotations are shown, and if the known mechanism is amongst these it is highlighted in orange. The ICE is the top hit in three analyses, as it carries multiple drug-resistance elements and is commonly found in multi-drug resistant strains<sup>16</sup>. The distribution of phenotype across the phylogeny is shown in Supplementary figure 5.

## Supplementary data

**Supplementary table 1:** Comparison of SEER with results from existing methods in finding genetic associations with antibiotic resistance in the Chewapreecha *et. al.* study of 3069 Thai carriage *S. pneumoniae* samples. For each of the five antibiotics, the true causal variant is listed, as are the number of hits passing the significance threshold for each method (plink and dsk) and the number which map to the correct region.

| Antibiotic      | Causal variant                                      | Significant sites |     | Near correct site  |                                      | Notes                            |
|-----------------|-----------------------------------------------------|-------------------|-----|--------------------|--------------------------------------|----------------------------------|
|                 |                                                     | plink             | dsk | plink              |                                      |                                  |
| Tetracycline    | ICE, <i>tetM</i>                                    | 8 029             | 0   | <i>tetM</i> – 124  | ICE – 2240                           |                                  |
| Chloramphenicol | ICE, <i>cat</i>                                     | 5 310             | 0   | <i>cat</i> – 0     | ICE – 1137                           |                                  |
| β– lactams      | <i>pbp2x</i> , <i>pbp1a</i> , <i>pbp2b</i>          | 858               | 0   | <i>pbp2x</i> – 210 | <i>pbp1a</i> – 113 <i>pbp2b</i> – 81 |                                  |
| Trimethoprim    | <i>dyr</i> (I100L)                                  | 4 009             | 0   | <i>dyr</i> – 47    | <i>dpr</i> – 53                      | Causal SNP ranked 22nd           |
| Erythromycin    | <i>ermB</i> , <i>mef</i> , <i>mel</i> , <i>mefA</i> | 8 469             | 0   | None               |                                      | Element not present in reference |

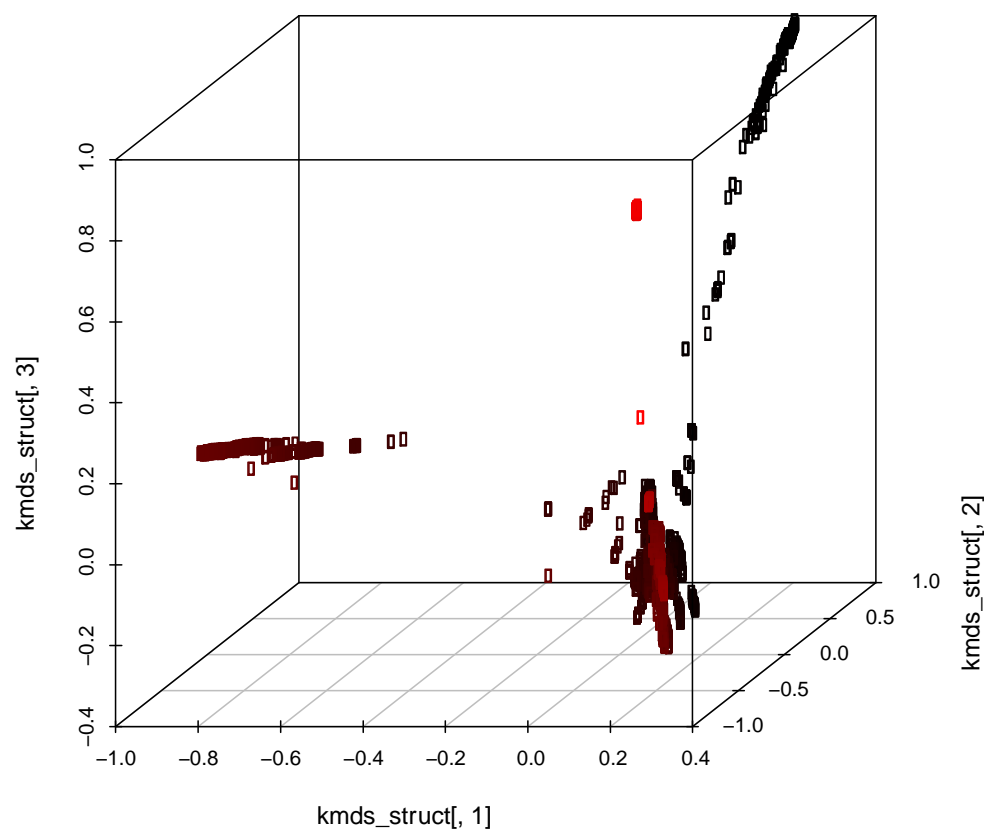

669  
670 **Supplementary figure 1:** Plot of the k-mer distances projected into three  
671 dimensions by MDS for the Chewapreecha *et. al.* study of 3069 Thai carriage *S.*  
672 *pneumoniae* samples. Shade from black to red is by y-coordinate (2<sup>nd</sup> MDS  
673 component).  
674



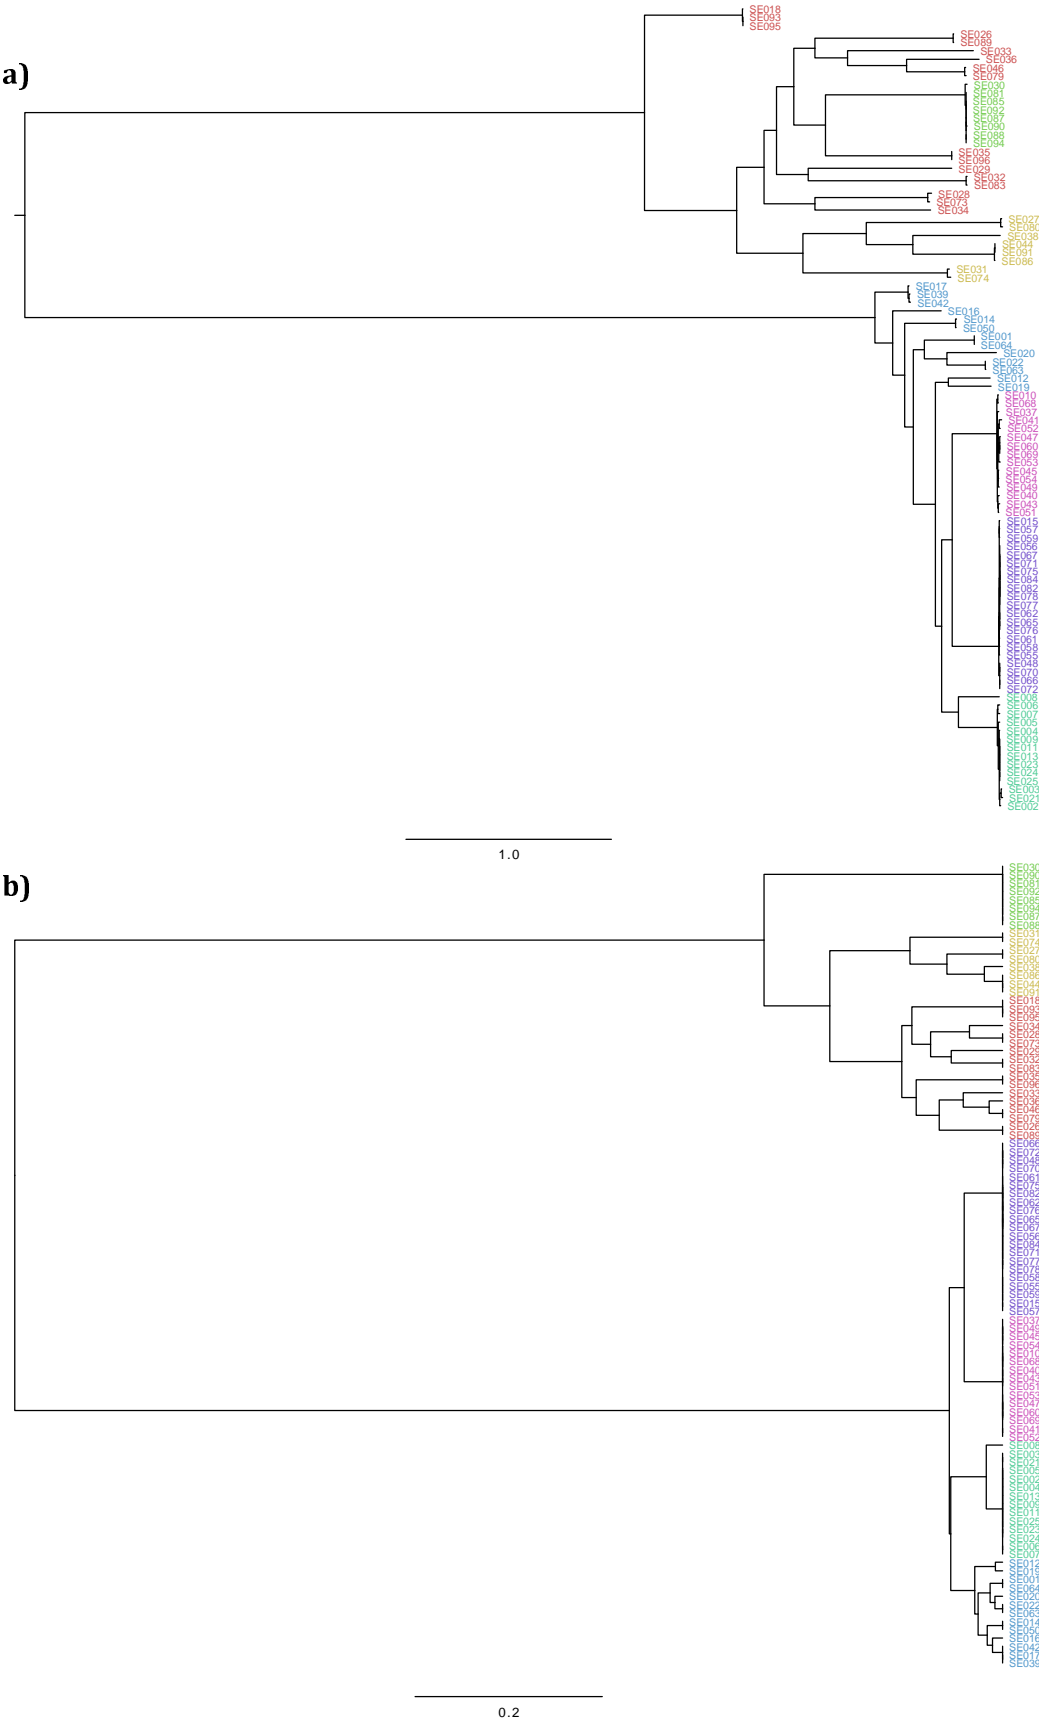

675 **Supplementary figure 2:** a) Tree used for Monte Carlo simulations of 96 *S.*  
676 *pneumoniae* genomes. b) UPGMA tree from k-mer distance matrix produced from

677 simulated reads. Colours are hierBAPS clusters.  
678  
679

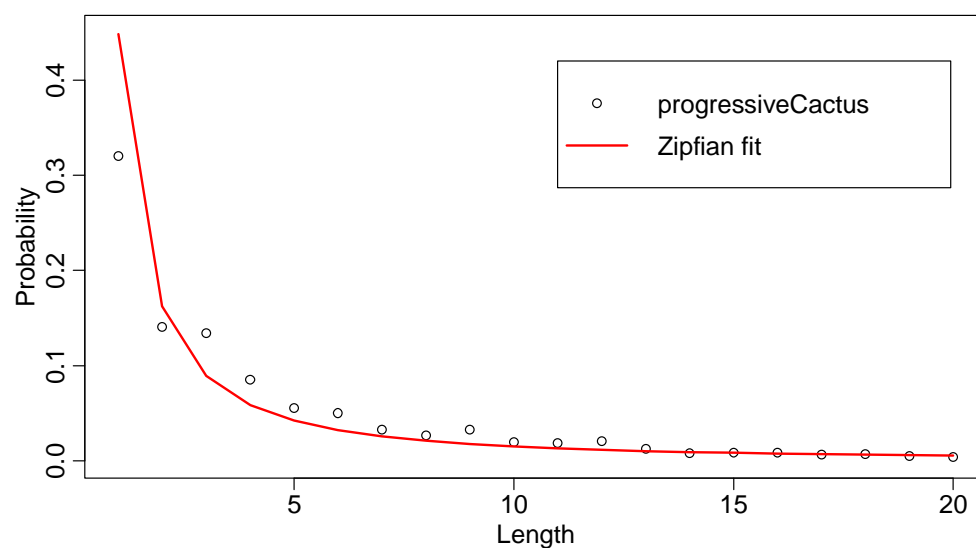

680

681

682

683

684

685

686

**Supplementary figure 3:** Estimated size distribution for INDELs, as estimated from a Progressive Cactus alignment of three members of the *Streptococcus* genus. A power law  $p=L^k$  (Zipfian function;  $p$  is probability,  $L$  is INDEL length,  $k$  is a free parameter) is fit to the data, the parameter  $k$  is used in the simulations.

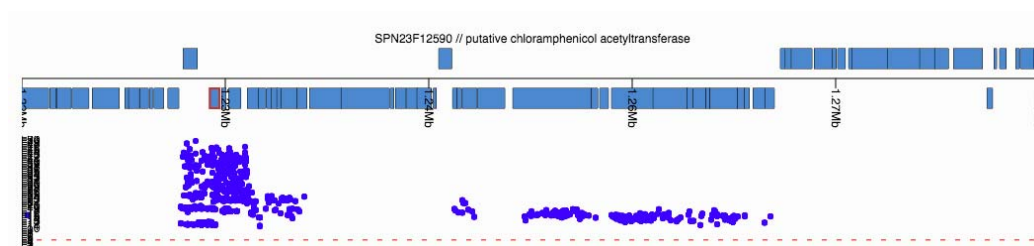

**Supplementary figure 4:** JScandy view of ATCC 700669 reference genome (blue blocks at top genes on forward and reverse strands) and Manhattan plot of start positions of the 1 508 of 1 526 k-mers significantly associated with chloramphenicol resistance which map to the integrative conjugative element (ICE) Tn5253. The hits are all in within the ICE, and the most significant hits cluster around the *cat* gene (which is outlined in red).

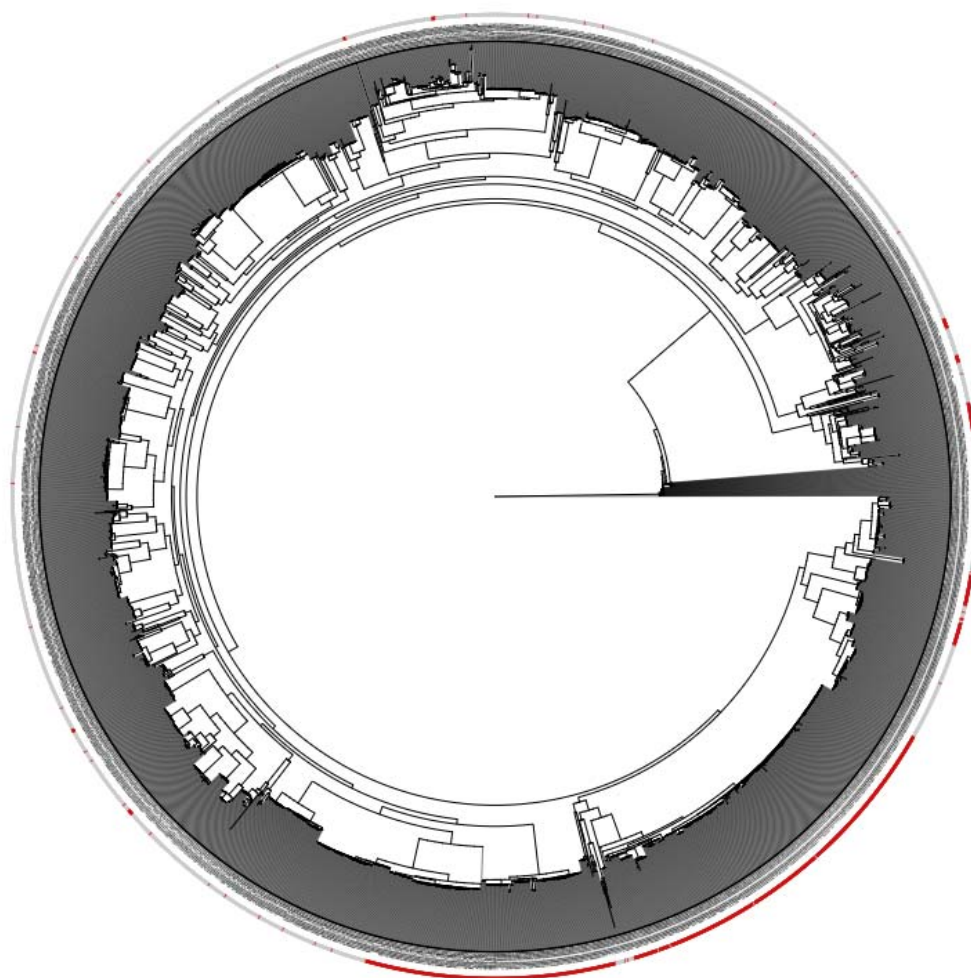

697  
698 **Supplementary figure 5:** Neighbour joining tree from Chewapreecha *et. al.*  
699 study of 3069 Thai carriage *S. pneumoniae* samples, from a SNP alignment  
700 produced by mapping to the ATCC 700669 reference strain. Outer ring: red if  
701 resistant to Erythromycin, grey if sensitive.  
702

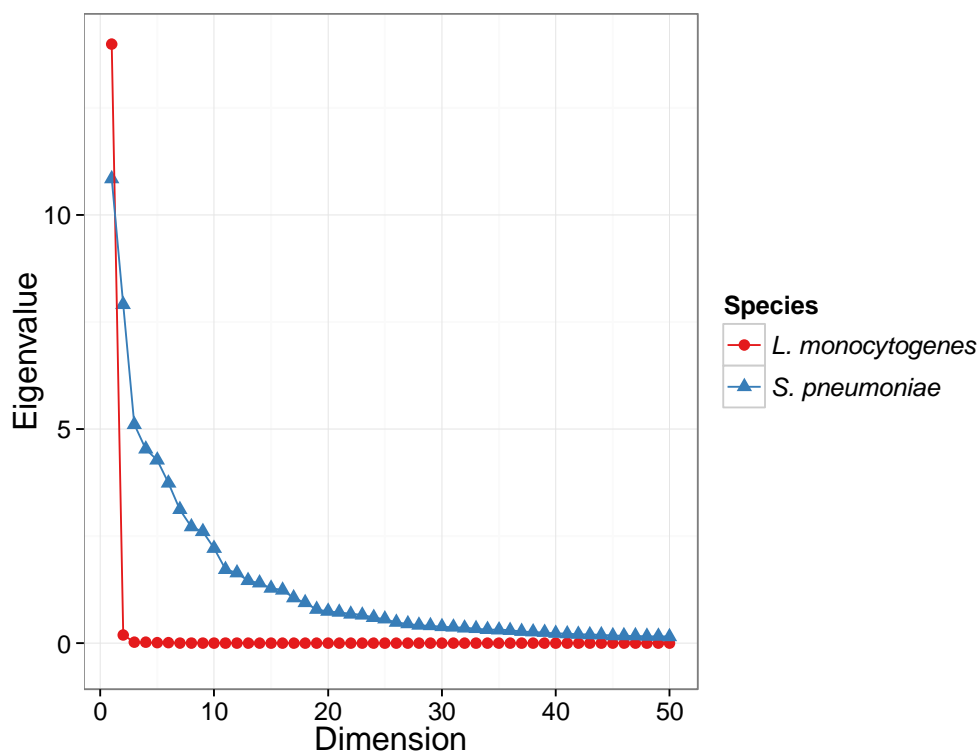

**Supplementary figure 6:** Scree plot for the first fifty dimensions of the 96 *Listeria monocytogenes* isolates (Supplementary figure 2) in red, 3 069 *Streptococcus pneumoniae* isolates (Supplementary figure 5) in blue.
